# Supplementary material
Source: publisher site journal article supplement (https://www.spandidos-publications.com/7844/downloadSupplementary)
Supplement: Supplementary file 1 [file downloadSupplementary]

## Sheet: Sheet1
Table SI. Programmed cell death-related genes obtained from databases and previous studies.
pyroptosis	parthanatos	necrosis	necrosis like morphology	necroptosis	lysosome dependent cell death	intrinsic apoptosis	immunogenic cell death	ferroptosis	extrinsic apoptosis	Entotic cell death	cuproptosis	autophagy	Apoptosis like morphology	anoikis
GSDMD	AIFM1	TNF	TP53	RIPK1	TP53	CBLIF	TP53	ZNF419	CASP8	TP53	ATP7A	AMBRA1	TP53	CEACAM5
GSDME	PARP1	TNFRSF1A	AKT1	RIPK3	EGFR	BCL2	ADA	ZFP69B	BCL2	MTOR	ATP7B	APOL1	TERT	PTK2
NLRP3	ADPRS	COL2A1	VIM	MLKL	ATM	CASP8	FAS	ZFP36	CASP3	TNFSF10	CDKN2A	ARNT	PTCH1	PIK3CA
CASP1	RNF146	TNFRSF1B	MYC	ZBP1	AKT1	CASP3	EGFR	YY1AP1	FAS	GZMB	DBT	ARSA	MYC	CEACAM6
CASP4	NAMPT	TNFSF10	BCL2	CASP8	TNF	BAX	BCL2	YWHAE	BAX	EZR	DLAT	ARSB	VIM	PDK4
GSDMB	GPX4	IL6	KRT5	TNF	PDCD1	FAS	PTEN	XBP1	XIAP	MRTFA	DLD	ATF4	BCL2	BCL2
GSDMC	MAPK8	LTA	RAC1	CYLD	MTOR	XIAP	CASP8	WIPI2	CFLAR	DIAPH1	DLST	ATF6	MAPK1	TSC2
NLRP1	SQSTM1	IL1B	FAS	ITPK1	IL6	TP53	ATM	WIPI1	FASLG	MAP1LC3A	FDX1	ATG10	TNF	PTRH2
IL1B	CAST	FAS	ABL1	IPMK	VHL	CASP9	PIK3CA	VLDLR	TP53	LPAR2	GCSH	ATG12	DNAH8	STK11
GZMB	AIMP2	IL10	CASP8	MAP3K7	CD274	CFLAR	AKT1	VEGFA	TNFSF10	CDH1	GLS	ATG16L1	EGFR	MAP3K7
GSDMA	RIPK1	TNFSF11	IL2RA	CASP6	DAPK1	FASLG	KRAS	USP7	CASP9	CTNNA1	LIAS	ATG16L2	FAS	NTRK2
AIM2	FEN1	TRPV4	AIFM1	TRPM7	RIPK1	CASP10	KIT	ULK2	CASP10	AMPK	LIPT1	ATG2A	GSN	CRYBA1
CARD8	ESR1	FASLG	LETM1	FADD	ABL1	AIFM1	TNF	ULK1	AIFM1	RHOA	MTF1	ATG2B	RAF1	MCL1
CASP8	RAB33A	TNFSF13B	CASP3	PELI1	IL1B	TNFSF10	PDCD1	UBC	MCL1	ROCK	PDHA1	ATG3	CASP3	DAPK2
GZMA	DIABLO	TNFRSF10A	SLC2A1	PGLYRP1	ICAM1	BCL2L1	CDKN2A	TXNRD1	BCL2L1	ATG5	PDHB	ATG4A	CCND1	NOTCH1
PYCARD	MCL1	IFNG	IFNG	SPATA2	JAK2	MCL1	FASLG	TXNIP	CYCS	ATG7	SLC31A1	ATG4B	JAK2	TLE1
DPP9	DDB1	TNFRSF10B	CYCS	SIRT3	STK11	CYCS	CCND1	TUBE1	TNF	PI3KC3	SLC25A3	ATG4C	AR	CAV1
CASP5	CUL4A	TRAF2	TNFRSF1A	HMGB1	PPARG	BCL2L11	MYC	TTPA	TNFRSF10B	BECN1		ATG4D	TUBB	SNAI2
IL18	TOMM20	MT-ATP6	PEPD	TP53	SRC	BIRC5	BRAF	TSC22D3	BIRC5	CYBB		ATG5	NDE1	IKBKG
ZBP1	OTUD1	TNFAIP3	PGR	TNFRSF1A	HIF1A	CUBN	CTNNB1	TRIB3	BCL2L11	UVRAG		ATG7	GLI1	SRC
CASP3	DCAF10	TNFRSF14	FOXP3	MEFV	EGF	CASP7	CASP3	TP63	CASP7	RUBCN		ATG9A	CYCS	AKT1
NLRC4	PTEN	TNFSF14	PAFAH1B1	AIM2	CFLAR	BOK	BAX	TNFAIP3	CASP2	CDC42		ATG9B	SALL4	MTOR
DPP8	ESR2	CXCL8	KRT20	TNFAIP3	TGFBR2	TNFRSF10B	ERBB2	TMBIM4	PRKCD	RNF146		ATIC	MDM2	CHEK2
MIR223		CASP8	FASLG	UCHL1	PTPN11	TNF	STAT3	TLR4	BID			BAG1	AIFM1	E2F1
CASP6		TNFRSF11B	BAX	STING1	CDK4	CASP2	SCN5A	TIMM9	TNFRSF10A			BAG3	CAV1	ITGA5
TRIM24		TNFSF12	NLRP3	TNIP1	MCL1	CASP6	IL6	TGFBR1	PAWR			BAK1	EDN1	ITGB1
HMGB1		TRADD	HIF1A	SERTAD1	PARP1	PRKCD	MTOR	TFR2	BOK			BAX	MKI67	BRMS1
NAIP		IL1A	RIPK1	TRAF2	TSC2	AKT1	IFNG	TFAP2C	AKT1			BCL2	SNCA
MEFV		TNFSF4	PARP1	NFKB1	MAPK14	MAPK8	HRAS	TBK1	CASP1			BCL2L1	CDKN1A
DHX9		TNFSF15	ANXA5	CFLAR	MITF	BID	TNFRSF10B	SUV39H1	MAPK8			BECN1	CD40
NLRP9		TNFSF13	NFKB1	MAPK14	PKLR	NAIP	CDH1	STMN1	CASP6			BID	EDNRB
STAT3		NUP62	TNFSF10	FAS	TSC1	CASP1	TGFB1	STK11	BIRC2			BIRC5	BAX
SIRT1		TP53	HTRA2	BIRC2	IKBKB	BIRC2	CD274	STEAP3	PARP1			BIRC6	NOS2
APIP		ADAM17	TKT	AIFM1	PTGS2	MIP	NRAS	SRXN1	FADD			BNIP1	APP
MALAT1		CASP3	CASP9	KLHDC10	IGF1R	PARP1	MAPK1	SREBF2	DIABLO			BNIP3	PRKCD
GAS5		RIPK1	USF3	SFTPA1	BCL2L11	DIABLO	VHL	SREBF1	SIVA1			BNIP3L	USP9X
CTSG		CRP	TNFSF12	GSK3B	CBL	KRAS	FGFR3	SRC	BIRC3			C12orf44	TREX1
NEK7		SLC25A19	BCL2L1	XIAP	CD36	LIM2	RB1	SP1	RIPK1			C17orf88	ATRIP
KCNQ1OT1		TNFRSF11A	HSPA5	MYC	CDK6	PAWR	TERT	SOCS1	KRAS			CALCOCO2	TGM1
TREM2		CD40	CAT	TNIP3	GBA	MAPK1	VEGFA	SNX4	BAK1			CAMKK2	ETS1
FOXO3		TNFRSF18	GAPDH	TLR4	PROM1	BAK1	CD4	SNORA16A	CDKN1A			CANX	NOS3
TP53		TNFRSF4	AURKA	GJB1	HMGB1	SIVA1	IL10	SMAD7	MOAP1			CAPN1	CASP9
MIR30C1		TLR4	CASP1	DNM1L	FLT1	BIRC3	KITLG	SLC7A5	MAPK1			CAPN10	CD4
NFE2L2		TNFSF9	TNFSF15	PTGES3	SQSTM1	TNFRSF10A	ALK	SLC39A14	STAT3			CAPN2	MAP3K1
TXNIP		TNFRSF25	FGF14	UVRAG	SMPD1	CDKN1A	CDKN1A	SLC2A8	TNFRSF1A			CAPNS1	PARP1
DDX3X		CCL2	XBP1	BRD4	CHEK1	STAT3	BAD	SLC2A6	BIRC7			CASP1	LEP
MIR22		TNFRSF9	CASP2	RB1	GSK3B	NRAS	LMNA	SLC2A3	MYC			CASP3	ANXA5
NEAT1		TNFSF18	HMGB1	SIRT2	YAP1	BBC3	HLA-DRB1	SLC2A14	PEA15			CASP4	JUN
MIR125A		IL18	ENDOG	IKBKB	TFEB	APAF1	BCL2L1	SLC2A12	MAP3K5			CASP8	SLC6A3
FOXP3		TNFAIP6	GP6	DAPK1	HSPA5	MYC	BID	SLC2A1	NRAS			CCL2	IL3
SESN2		MAPK8	MBL2	FKBP1A	FOXO3	MAPK14	BCL6	SLC1A4	CCAR1			CCR2	CD44
ELANE		TNFRSF6B	BNIP3	MIR425	NOTCH3	BAD	RIPK1	SLC16A1	APAF1			CD46	THBS1
TNF		CD40LG	GSS	EZH2	TRAF2	MOAP1	ABL1	SIRT3	MAPK14			CDKN1A	CUL3
GBP1		TNFRSF10C	SP1	NFE2L2	IL6ST	RIPK1	CXCL8	SETD1B	ANXA5			CDKN1B	NME1
MEG3		TNFRSF10D	TNFRSF10A	CD274	CTSD	API5	IL2	SELENOS	BAD			CDKN2A	BCL2L1
MIR135B		LTBR	TNFRSF10B	CHMP4B	SIRT1	MAP3K5	XIAP	SCP2	BFAR			CFLAR	CASP7
MIR556		ICAM1	NRIP1	CXCL5	VCP	BIRC7	MAPK8	SAT1	AVEN			CHMP2B	PRKCA
FMR1		TNFRSF8	IAPP	MIR29B1	TRAF6	CCAR2	IL1B	RPTOR	NOL3			CHMP4B	EPO
MIR302A		FADD	CAPN1	BCL2	SHC1	FADD	ICAM1	RIPK1	CASP4			CLN3	SIRT1
UBR2		MYLK	BECN1	AXL	CTSB	AEN	TTN	RGS4	BBC3			CTSB	FDFT1
CPTP		TNFSF8	TNFRSF12A	MERTK	STK4	CCAR1	RET	RELA	IL1B			CTSD	CAT
GJA1		COL1A1	ENO1	TYRO3	PKM	AVEN	BRCA1	RB1	TRAF2			CTSL1	TLR3
SNIP1		XIAP	TYMS	SIRT6	CD86	TNFRSF1A	CXCR4	PVT1	PERP			CX3CL1	BIRC5
PRDM1		ADAR	PDLIM1	NAT2	ITGA5	CASP4	NFKB1	PTGS2	IL10			CXCR4	REN
MIR214		IL1RN	RPAIN	SLC39A7	CTNND1	PEA15	CTLA4	PTEN	TRIAP1			DAPK1	MCL1
PCSK9		TNFRSF17	TNFRSF6B	USP22	PARK7	ANXA5	BRCA2	PSAT1	IL6			DAPK2	JAK3
VDR		TNFRSF13B	PLA2G7	PANX1	NLRP3	JUN	STAT1	PROM2	JUN			DDIT3	MAPK8
BRD4		TGFB1	MYO10	PDCD6IP	BECN1	PERP	JAK2	PRKAA2	TNFRSF10C			DIRAS3	NOS1
AGER		TGFB2	DIABLO	FLOT1	AHR	MDM2	EPCAM	PRKAA1	TNFRSF10D			DLC1	PRKCE
IKBKE		ACTA2	ATG4B	FLOT2	HDAC6	CIAPIN1	PTCH1	PRDX6	IFNG			DNAJB1	BIRC8
PKM		LTB	ATG3	IL37	XRCC5	BFAR	VCAM1	PRDX1	IL2			DNAJB9	ADIPOQ
KIF23		TRAF3	MAP1LC3A	DIABLO	RIPK3	NOL3	STK11	POR	MDM2			DRAM1	ANXA1
IFI16		RIPK3	PRKAA1	FASN	HSPA8	TP53AIP1	JUN	POM121L12	NFKB1			EDEM1	HTRA2
CRTAC1		IL4		CDK9	RPS27A	AATF	CD44	PML	TRADD			EEF2	FDPS
SEZ6L2		TNFRSF19		TIMM50	ANXA2	TRIAP1	FLT3	PLIN4	BCL2L2			EEF2K	LTF
SMIM1		TRAF1		SLC25A37	C9orf72	E2F1	MIR34A	PLIN2	CASP14			EGFR	CASP6
MIR20B		PTGS2		PPP1R3G	MAP3K7	MTOR	PPARG	PLA2G6	BIK			EIF2AK2	CASP1
MIR448		TNFRSF12A		MIR7-1	IL1R1	TP53BP2	ITGB1	PIR	CXCL8			EIF2AK3	DNASE1
TET2		SMAD3		NFKBIA	HCK	NFKB1	SRC	PHKG2	E2F1			EIF2S1	CD47
TRAF6		CD70		AURKC	DDR1	CHEK2	PIK3R1	PHF21A	CASP5			EIF4EBP1	TNFSF10
CTSV		ADIPOQ		NGFR	VTN	AREL1	TNFSF10	PGD	MTOR			EIF4G1	RASSF1
UTS2		VCAM1		FMR1	PRKAA1	DAXX	NCAM1	PEX6	GZMB			ERBB2	XDH
ZNF532		CSF2		GNLY	UBC	RAF1	EGF	PEX3	EGFR			ERN1	CHP1
MIR155HG		HLA-DRB1		PARP1	IRF3	GZMB	IL4	PEX2	SOD2			ERO1L	TUBA4A
MIR155		HLA-B		HTRA2	ARSA	EGFR	CD40	PEX12	BCL2L14			FADD	CASP2
ZFAS1		PRKG1		HSPA5	NEDD4	BCL2L2	C11orf65	PEX10	HSPA5			FAM48A	CAPN1
MIR527		TGFBR1		PRKAA2	CD1D	DDIAS	MUC1	PEBP1	IL4			FAS	TP73
MLKL		SLC2A10		PRKAA1	LAMP2	CDKN2A	IL2RA	PCK2	PYCARD			FKBP1A	LALBA
PTPN11		CFLAR		PITPNA	KCNB1	TRAF2	PDCD1LG2	PARK7	DFFA			FKBP1B	MAPK14
MAPK14		ACE		METTL3	IRAK1	CAAP1	HIF1A	PANX1	PTEN			FOS	F2R
NFKB1		MIF4GD-DT		TRAF5	CTSK	TNFRSF10C	PTPN11	P4HB	TGFB1			FOXO1	GADD45A
APOE		TNFRSF21		FNDC4	TAB2	ECSCR	TGFBR2	OXSR1	RAF1			FOXO3	STAT5A
ANXA1		TRAF6		FNDC5	ROR2	MIR21	CFLAR	OTUB1	BECN1			HDAC1	APOL1
SDHB		NFKB1		FASLG	GDF15	TNFRSF10D	BIRC5	OSBPL9	GSK3B			HDAC6	FAM111A
P2RX7		LEP		TXN	IFNGR1	MAPK3	NPM1	NT5DC2	TLR4			HGS	DYNC1I2
EEF2K		LOX		RALBP1	TRIM28	FOXO3	CDK4	NRAS	CDK1			HIF1A	ATRIP-TREX1
FPR2		MYH11		TP53I3	CTSL	CASP14	HLA-B	NR4A1	FOXO3			HSP90AB1	BAK1
HTRA1		IL2		GSDMD	STUB1	TP73	CASP9	NR1D2	HIF1A			HSPA5	PLA2G4A
PAK2		ALB		PRKN	ATG5	ERBB2	HAVCR2	NR1D1	VEGFA			HSPA8	TNFRSF10A
NDUFA13		IL4I1		HSP90AA1	CAPN1	BIK	FGF2	NQO1	BCL2L10			HSPB8	TNFRSF10B
CD274		TGFBR2		STUB1	LAMP1	HIF1A	PCNA	NOX5	CD4			IFNG	APAF1
SETD7		TGFB3		TNFSF10	RPS6KA3	CLU	FH	NOX3	DAXX			IKBKB	BECN1
FGF21		CYCS		CDC37	CUL1	PTEN	INS	NOX1	MIR21			IKBKE	TERF1
MIR185		SELE		RELA	IAPP	CASP5	MCL1	NOS2	HTRA2			IL24	BCL2L11
DLX6-AS1		BIRC3		TRPC6	RB1CC1	LMNA	KDR	NNMT	TP73			IRGM	VDAC1
MIR23A		HMGB1		SIRT5	CSNK1A1	ATM	CYCS	NGB	MAPK3			ITGA3	SIRT3
MIR520C		VEGFA		MIR21	PPIA	HRAS	MDM2	NFS1	PTGS2			ITGA6	TUBA1B
KLF3-AS1		FLNA		AURKA	MCOLN1	PYCARD	NFKBIA	NF2	CDKN2A			ITGB1	LINGO1
MMP1		IL1R1		PLK1	SERPINB3	ELAPOR1	CD40LG	NEDD4L	ATM			ITGB4	IDO1
IKZF1		BIRC2		TNFRSF10B	HGS	PMAIP1	CD28	NCF2	CCND1			ITPR1	STK17B
BSG		ELN		MYH9	GAA	PTGS2	PARP1	MYB	TNFSF12			GAA	HERPUD1
CEBPB		CASP1		CASP10	RPTOR	BECN1	APC	MUC1	IL2RA			GABARAP	TFPT
TFAM		NOTCH1		SQSTM1	CBLB	IGF1	TNFRSF10A	MTOR	PMAIP1			GABARAPL1	RUNX3
PGF		MAPK1		SOAT1	RAB7A	APP	FGFR1	MTDH	RELA			GABARAPL2	SIRT2
TRIM21		TRAF5		TNFRSF10A	PEBP1	CDK1	RAC1	MTCH1	TNFRSF25			GAPDH	ENDOG
CEP55		TNFAIP1		HGF	PHLPP1	CD4	WT1	MT3	MAPK10			GNAI3	BAD
CXCL8		TNFRSF13C		SRC	APOD	DFFA	MAPK14	MT1G	IGF1R			GNB2L1	ATP12A
NLRX1		IL17A		ANXA1	UBB	TGFB1	IL7	MT1DP	F10			GOPC	PDE5A
SLC16A4		SMAD4		CASP2	IFNAR1	VEGFA	MITF	MMP13	TET2			GRID1	PSIP1
USF2		TNFAIP2		FPR1	RAB5A	SEPTIN4	VIM	MMD	IGF1			GRID2	ATOH1
IL32		RELT		MIF	CLCN7	SQSTM1	CXCL12	MLLT1	IL15			KIAA0226	TOP3B
PIF1		CBS		BCL2L1	DACT1	PML	BCR	MIR9-3	JAK2			KIAA0652	MIR130A
SLC30A7		MMP9		KL	NUMB	CCND1	APP	MIR9-2	RNF34			KIAA0831	PPP3R2
CHRFAM7A		FBN1		TNFRSF21	AQP2	HSPA5	SYK	MIR9-1	CLU			KIF5B	PRDX6
MIR21		IFNA1		BMI1	CLDN5	BCL2L10	IL3	MIR6852	SIRT1			KLHL24	PRDX5
MIR124-1		TERT		BBC3	MAP1LC3A	SOD2	FGFR2	MIR4715	PTK2			LAMP1	PDGFD
MIR200C		HBB		AVEN	VPS33A	LDB3	TSC2	MIR424	MAPK9			LAMP2	SQLE
MIR195		CD27		ZNF7	TNK2	HTRA2	ABCB1	miR-378a-3p	IL1A			MAP1LC3A	H2BC21
MIR485		FOXE3		PTEN	CSNK1E	MAPK10	NFE2L2	MIR30B	PIK3CG			MAP1LC3B	H1-1
MALT1		BAX		ESR2	NCOA4	BCL2L14	TFRC	MIR214	PML			MAP1LC3C	GZMA
TLR2		JUN		GSK3A	ARL8B	TRADD	IRF1	MIR212	IL18			MAP2K7	GPR87
ICAM1		TLR2		C5	ULK1	IL10	TRA	miR-182-5p	CDK2			MAPK1	BCL2L2
STK4		MFAP5		SP1	UBE2D1	IL2	KCNH2	MIR17	HDAC9			MAPK3	RPS5
GSK3B		NFKBIA		C9	SLC1A5	SIRT1	CD3E	MIR137	ICAM1			MAPK8	UBE3C
PTGS2		MAPK14		ATG5	ABL2	HINT1	RELA	MIOX	DAPK1			MAPK8IP1	PRDX4
MST1		BCL2		C6	MSTN	CDK2	FOS	MAPK9	NFKBIA			MAPK9	MAPK13
PRF1		PLOD1		C7	MAP1LC3B	ESR1	CDK1	MAPK8	FOS			MBTPS2	WNK3
PRMT5		CD14		CD74	SNAP23	RB1	CD34	MAP3K5	TLR2			MLST8	ADRB3
VTN		CSF1		EGR1	AGFG1	ACTA2	ENG	MAP3K11	BAG3			MTMR14	BIK
ELAVL1		MLKL		NOX4	GABRA1	IFNG	TNFRSF1A	MAP1LC3A	IL3			MTOR	H3C15
MPEG1		BGN		RCN1	VPS4B	PPP1R13B	TP73	MAFG	VDAC1			MYC	PLAAT4
STING1		CHUK		MKRN1	GABARAPL1	DDIT3	PRF1	LYRM1	CTLA4			NAF1	BCL2L10
MIR204		SMAD2		TNFSF12	GABARAP	PIK3CG	CAV1	LURAP1L	BCL2A1			NAMPT	TDRD3
CDKN2B-AS1		ESR1		UHRF1	SBF2	RELA	CD247	LRRFIP1	TXN			NBR1	SERPINB9
HOTTIP		ACTA2-AS1		AIFM2	UBE2D3	MAP2K1	MMP9	LPIN1	SRC			NCKAP1	ANKRD36B
MIR141		PARP1		CTSB	VAMP8	TNFRSF25	HLA-A	LONP1	RIPK3			NFE2L2	MIOX
MIR9-1		MAT2A		CD40LG	TAB3	PPARG	CSF2	LOC390705	PPP1R13B			NFKB1
MIR455		EDAR		OGT	VAMP7	FLNC	SOD1	LOC284561	DFFB			NKX2-3
MIR9-2		IKBKB		BID	ATP13A2	CDKN1B	HMGB1	LINC00618	CXCR3			NLRC4
MIR9-3		JAG1		IFNB1	BACE2	IGF1R	GZMB	LINC00472	TNFRSF1B			NPC1
MIR497		NOS2		ID1	MIR33A	IL3	CSF3	LINC00336	TRAF1			NRG1
LINC-ROR		MIR21		MIR155	CALCOCO2	AKT2	FHIT	LIG3	IL5			NRG2
ABL1		MMP1		TLR3	RNF41	OPA1	PTGS2	LCE2C	BIRC6			NRG3
EPHA2		HMOX1		KIAA1191	LGALS8	CXCL8	TSC1	LAMP2	CCL2			P4HB
HDAC6		F3		CYP3A4	UBE2E1	HRK	MMP2	KRAS	DDIT3			PARK2
PPARG		TNFAIP8L2		PAK1	GABARAPL2	AATBC	TP63	KLHL24	APP			PARP1
TLR3		SERPINE1		SGK1	UBE2D2	ABL1	FOXP3	KIM-1	FAF1			PEA15
SQSTM1		MMP3		CDC7	CBLL1	NFKBIA	MYD88	JUN	BRCA1			PELP1
CDK9		RELA		IDO1	ULK2	BCL2L13	TRB	JDP2	IFI27			PEX14
IRF3		COL3A1		SMN1	SMCR8	CTNNB1	MLH1	ISCU	PPARG			PEX3
UCP1		CSF3		SMN2	RAB21	IL6	CREBBP	INTS2	STK4			PIK3C3
TREM1		MAP3K5		CERK	ATG13	BRCA2	KLRK1	IL33	BCL10			PIK3R4
TSLP		MED12		TRADD	STX5	TIA1	GATA2	IL1B	ATG5			PINK1
ZDHHC1		FBN2		TP63	MCOLN3	TNFSF12	CALM2	IFNG	HMGB1			PPP1R15A
HNP1		TNFAIP8		IL1A	VPS11	TET2	IGF1	IDH1	MAP2K1			PRKAB1
PTEN		INS		PADI4	MCOLN2	IL1B	TLR4	HSD17B11	ABL1			PRKAR1A
DRD2		COMP		MIR214	VPS16	SRC	IGF1R	hsa_circ_0008367	CDKN1B			PRKCD
ADORA1		NGFR		MIR22	SHFL	BRCA1	BTK	HRAS	NGF			PRKCQ
ADORA2B		NEK9		MIR221	ILKAP	YWHAQ	IL1A	HNF4A	CTNNB1			PTEN
ADORA2A		COL5A1		MIR101-1	PDE1C	NR3C1	FN1	HILPDA	RB1			PTK6
ADORA3		MEFV		MIR485	EI24	MAPK9	CD19	HIC1	HSPB1			RAB11A
OSM		BMP6		MIR101-2	PLEKHM1	AKT3	CCL2	HERPUD1	HMOX1			RAB1A
METTL3		EDA		CTSD	MREG	CBL	ICOS	HELLS	ERBB3			RAB24
PECAM1		TNFSF12-TNFSF13		CLEC7A	CACYBP	PTK2	CD8A	HCAR1	CD40			RAB33B
METTL14		GNPTAB		OTULIN	FYCO1	PCNA	LHCGR	HBA1	TERT			RAB5A
TRIM31		NPM1		TRIM28	GPSM1	CSE1L	EPO	HAMP	AR			RAB7A
MIR25		COL5A2		STAT3	ROBO3	TP63	MAPK3	GSK3B	ESR1			RAC1
CAMP		NDE1		PGAM5	ACP2	JAK2	HGF	GRIA3	EGF			RAF1
NLRP6		LOC101448202		HPRT1	VPS18	YWHAE	THY1	GPX2	NR4A1			RB1
MRE11		LOC113939944		FAP	MAEL	HSP90AA1	BIRC3	GPT2	STAT1			RB1CC1
FNDC4		TRAF4		CHL1	SLC2A12	XAF1	HSP90AA1	GPAT4	TNFRSF11B			RELA
FNDC5		FN1		TRIM24	ATG4A	HDAC9	SLC4A1	GLUT13	TNFAIP3			RGS19
MAP3K7		GBA1		TGFBR1	NLRP6	DFFB	SMARCA4	GDF15	SOD1			RHEB
PARP1		IL1RAPL2		CDKN2A	LAMTOR5	RIPK3	TET2	GCH1	IFNA1			RPS6KB1
USP8		EDA2R		SNCA	VPS41	VDAC1	CDK6	GABPB1	CHUK			RPTOR
PRKN		HEY2		ACVR1B	SIGLEC15	FOS	CD36	GABARAPL2	F3			SAR1A
GBP5		F5		DDX58	CTSV	HSPB1	ALB	GABARAPL1	NFE2L2			SERPINA1
NR1H2		GATA4		PYGM	SCFD1	NFE2L2	TLR2	G6PDX	CAT			SESN2
MKI67		C1QTNF5		TARDBP	STX6	DYSF	MIR20A	G6PD	PIK3CA			SH3GLB1
USP47		TRAP1		CCL2	SEC22B	BDNF	POU5F1	FZD7	YAP1			SIRT1
TCEA3		GPT		XRCC1	MIR33B	HMGB1	MIR29A	FXN	PAK2			SIRT2
IL36G		NOD2		DPEP1	MAP1LC3C	PIK3CA	GFAP	FNDC5	KRT18			SPHK1
IL36B		HGF		CHMP1A	KDM7A	TCN2	B2M	FLT3	HRAS			SPNS1
TP63		C1QTNF3		UBR2	TIFAB	YWHAB	CD27	FH	ERBB2			SQSTM1
IRF1		IL2RB		GPX4		YAP1	FCGR3A	Fer1HCH	MPO			ST13
IRF2		CASP9		LAMP2		BCL2A1	ITGB2	FBXW7	CHEK2			STK11
PRTN3		HIF1A-AS1		MPRIP		PTPN11	CREB1	FBW7	TP63			TBK1
SERPINB1		SRFBP1		MTOR		IL4	IFNA1	FAR1	NR3C1			TM9SF1
IL1A		MYLK-AS1		BRAF		EGF	ING1	FANCD2	PCNA			TMEM49
CHMP4B		LINC01389		AFP		CD40	HMOX1	FADS2	CD274			TMEM74
DUOX1		SMAD6		ACHE		PDCD6	CEACAM5	FADS1	RARA			TNFSF10
APOL1		TIMP1		NFAT5		HMOX1	CCL5	EPT1	TLR3			TP53
NLRP7		EP300		CXCL1		IL5	PDGFRA	EPAS1	IKBKB			TP53INP2
ANO6		ELANE		VIL1		PRKN	IL15	ENPP2	YWHAB			TP63
BNIP3		TANK		SHARPIN		PDCD5	SOX2	EMC2	ALB			TP73
XIST		SLC12A5-AS1		CBL		RNF7	ITGA4	ELOVL5	ENDOG			TSC1
MIR107		CCL5		MAPK1		F3	FBXW7	EIF2AK4	HSPA4			TSC2
MIR103A1		C1QTNF9		MAPK8		TTN	MAPT	EGLN2	MADD			TUSC1
MIR103A2		IL2RA		TBK1		VCP	ITGB3	EGFR	HSP90AA1			ULK1
FADD		STAT3		CTSH		FAF1	ANXA5	DUSP1	CCNB1			ULK2
VCAM1		TINF2		GSN		MYH7	NGF	DUOX2	ABCB1			ULK3
EZH2		CTLA4		RARG		GSK3B	CALR	DUOX1	CCNA2			USP10
DNMT1		GZMB		BIRC3		TNFRSF1B	SPP1	DRD5	IFNB1			UVRAG
DNMT3A		ROBO4		CTSL		TLR4	GBA	DRD4	IRF1			VAMP3
DNMT3B		PPARG		CTSS		AR	MSH6	DPP4	PRPF8			VAMP7
BAX		STAT1		DSTYK		TXN	PROM1	DNAJB6	HIPK2			VEGFA
CYCS		CREBBP		RNF31		FOXO1	CSF1	DECR1	MMP9			WDFY3
POLA1		C1QTNF1		TNFRSF25		NGF	PRKCA	DDIT4	NOS2			WDR45
BAK1		STING1		CHUK		SOD1	BAK1	DDIT3	CCL5			WDR45L
CHMP2B		IL12B		BUB1B		CCNA2	IL2RB	DCAF7	SQSTM1			WIPI1
EED		H19		IRAK1		SYVN1	CCR5	DAZAP1	NLRP1			WIPI2
PRIM1		ACAN		BDNF		CARD8	IL13	CYP4F8	YWHAQ			ZFYVE1
RBBP4		FGF2		EIF2AK3		ABCB1	IGH	CYBB	CDK4
RBBP7		TICAM1		HSPA8		CHUK	NOS2	CYB5R1	CD69
SUZ12		IGF1		IFNG		ALB	ERBB4	CXCL2	DAPK3
POLA2		MIR155		IKBKG		F10	VWF	CS	IRF3
CHMP2A		CERNA3		MAPK3		TRAF1	NTRK1	CISD2	TNFRSF12A
PRIM2		SOD2		NQO1		CAV3	CAT	CISD1	F7
CHMP3		HLA-A		TAB2		RASGRP1	CLU	CircIL4R	MAP2K4
CHMP7		IFNB1		BECN1		EP300	CEACAM1	CHP1	FCER2
CHMP6		C1QTNF4		XBP1		MMP9	PMS2	CHMP6	NGFR
H2AX		OTULIN		TICAM1		DSP	ERBB3	CHMP5	HSPA1A
CHMP4A		IL15		RBCK1		CAT	CD79A	CEBPG	PRKCA
CHMP4C		POLG		SOX17		STK4	E2F1	CDO1	CDK5
H3-3A		B2M		UBC		BRAF	NGFR	CDKN2A	PIK3R1
H3-3B		LOC100506472		BNIP3		BNIP3	SP1	CDH1	CD27
H3C1		AAT1		HSPA4		HDAC1	SOX9	CDCA3	WWOX
H2AC20		ANXA5		TAB1		SH3KBP1	CASP1	CD82	PRF1
H2AZ1		TNFAIP8L1		AGFG1		TGM2	ENO2	CD44	PIDD1
H2BC21		PSMD2		TAB3		IGFBP3	MMP1	CAV1	PTPA
H4-16		MEG3		EIF2A		CDK5	ROS1	CARS1	IL13
H4C1		AKT1		MIB2		RARA	CEP85L	CAPG	GSK3A
H2BC4		F2		TNIP2		IFNA1	PLAU	CA9	YWHAE
H3C2		PTX3		H1-5		BCL10	LIG4	BRPF1	ELANE
H3C3		C1QTNF6		DIRAS3		IKBKB	DDX3X	BRDT	IGHE
H4C2		IKBKG		C20orf204		MIR146A	MIR19A	BRD3	CXCR4
H2AC4		TNFAIP8L3		EGFR		IRF1	MME	BRD2	SMPD1
H2BC5		BMP2		JAK1		NOS2	IDH1	BNIP3	FOXO1
H3C12		CCL3		FLT3		YWHAZ	TNFRSF1B	BLOC1S5-TXNDC5	MAP3K7
H3C4		NPPA		IDH1		BIRC6	MS4A1	BID	SP1
H4C11		CASP10		IDH2		IL2RA	BIRC2	BCAT2	PDCD1
H4C3		CCR6		HMOX1		PIK3R1	TLX1	BACH1	IL24
H4C8		IRF1		MMP13		DAPK1	DNMT3A	AURKA	CDH1
H4C9		ZFP36		ATP2A1		SP1	TGFB2	ATP6V1G2	PRKN
H2BC12		HLA-DQB1		CAD		BAG3	SELE	ATM	CD8A
H2BC14		EGF		CASP1		RIPK2	MKI67	ATG7	IL17A
H2BC9		IL13		DRD2		ENDOG	HLA-G	ATG4D	TFPI
H3C10		SOD1		EPAS1		TNFRSF11B	IL17A	ATG3	ATR
H3C14		MAP3K14		G6PD		STAT1	TGFA	ATG16L1	STK11
H4C12		ACTA1		GJA1		PPP1R13L	ALCAM	ATG13	EPO
H4C14		NOS3		NPM1		C1QBP	CDKN3	ATF2	KIT
H4C5		HSP90AA1		TSC2		DNM1L	SNCA	ASNS	BDNF
H2AC14		BCL2L1		VCP		MAP2K4	ICOSLG	ARRDC3	CSF2
H2AC18		STAT4		VIM		CCNB1	TCL1A	ARNTL	IGFBP3
H2AC6		TYMS		ACTB		VHL	THPO	AQP8	TNFSF11
H2AC7		IL3		AHR		HIPK2	SST	AQP5	HGF
H2AJ		NAGLU		BAX		GSDME	MYCN	AQP3	BNIP3
H2AZ2		MIR221		EEF2		TERT	AURKA	ANO6	CASP12
H2BC1		PTPN11		KIF11		PRKCA	TLR3	ANGPTL7	STK3
H2BC10		REN		PTPN6		F8	GSK3B	AMN	CAV1
H2BC11		MIR146A		RPS19		NR4A1	CALM1	ALOXE3	CCL3
H2BC13		BDNF-AS		YWHAE		CDK4	THBD	ALOX15B	DNM1L
H2BC3		IRF3		YWHAG		NGFR	CD80	ALOX12B	NPM1
H2BC6		BGLAP		APC		HSPA4	PDGFB	ALDH3A2	H2AX
H3C11		MAPK3		BAP1		HSPA1A	MIR93	ALB	F2
H3C6		SGCA		HSP90AB1		ACTC1	BMP6	AGPS	CRADD
H3C7		CALCA		HSPD1		SCN5A	HDAC9	AEBP2	SELL
H3C8		TERC		KRT18		TNFAIP3	BMP2	ACVR1B	YWHAZ
H4C13		RTEL1		LEF1		PAK2	HSPA5	ACSL3	C1QBP
H4C4		RETN		LRP1		CREBBP	THBS1	ACOT1	TNFSF13B
H4C6		JAK2		MAPKAPK2		PDCD6IP	HLA-DQB1	ACO1	FN1
H2AC8		MB		NOD2		IFI27	SERPINE1	ACADSB	CXCL2
H2BC15		MAP3K7		PIKFYVE		STK3	CHGA	ABCC1	FLT3
H2BC17		LITAF		PRDX1		IRF3	NTRK2		SFTPD
H2BC7		ERAP1		RANBP2		KRT18	DSE		FAM215A
H2BC8		NR3C1		RPL11		ATG5	MPL		FAIM2
H2BU1		MPO		SLC16A1		PSEN1	IL5		PIM1
H3C15		THBD		TNNT2		YWHAG	CSF1R		CHEK1
H3C13		MMP2		TPM1		CXCR4	TYR		PLK1
H4C15		WRAP53		AFG3L2		MAP3K1	CASP7		ITPR1
H2AB1		SELP		CLTC		CSNK2A1	IL18		LGALS3
H2AC19		COL1A2		HIF1A		TLR2	CD209		SHC1
RNF103-CHMP3		SLC22A12		HSPA9		KLHL9	FYN		SFRP1
LOC102724334		HIF1A		KRT1		IL13	LEP		STAT6
CAPN1		C1QTNF2		KRT14		TAFAZZIN	MPO		UNC5B
VIM		UMOD		KRT5		ESR2	CCND2		IER3
JUN		INSR		KRT8		TPM1	NR3C1		PRKCI
RIPK3		STEAP4		MYH14		BCL6	CTSD		EP300
MIR139		CTNNB1		NFS1		PRPF8	G6PD		BCAP31
BRCC3		APOE		NLRP3		PRF1	TNFSF11		PTPN13
BHLHE40		C1QTNF7		PINK1		NLRP1	ANK2		GSN
BHLHE41		CASP4		PPP1CB		CDH1	IL6ST		NOTCH1
ALK		IFNGR1		PRPS1		CTSD	PLAUR		EZH2
CSNK1A1		APOH		PRSS1		ATR	CCR6		DNASE1L3
BIRC3		IL23R		RPL5		TSC2	CD2		CRP
TFAP2A		RYR1		SLC25A1		PLK1	KRT19		JAK1
BIRC2		C1QTNF9B		SLC25A13		KIT	CR2		YWHAG
E2F4		BAK1		TNFRSF1B		SLC25A4	ITGAL		ESR2
UBE2D2		CDKN2B-AS1		TPM3		PDCD10	BAP1		RPS6KB1
LY96		LCN2		TRAF3		TNFSF13B	HSPB1		VHL
GLMN		PTGS1		TUFM		ADA	ABCG2		GAPDH
SUGT1		ACE2		ARHGEF2		INS	STAT5A		YWHAH
IRGM		MIR7-3HG		ATF4		CREB1	BSG		CCR6
NLRP13		BID		CALM1		PDCD1	GPC3		BRAF
SCAF11		EDN1		COPB2		ACTN2	HSPA4		MMP2
ADAMTS9-AS2		TLR9		DDX3X		WWOX	ABCC1		CDK6
NINJ1		PTPRC		DDX5		STK17B	GAPDH		RFFL
TUBB6		IL12A		EIF4EBP1		YWHAH	MMP14		TNFRSF21
MYD88		PLA2G4A		FLNC		IL15	TNFSF13B		CD40LG
TLR8		CST3		HNRNPA1		BCR	TRG		NOS3
APAF1		LINC01672		HNRNPA2B1		DAPK3	S100B		DEDD
NOS1		OPTN		HSPA1A		PPIA	CD81		TNNI3
NOS2		MIR210		IKBKE		MAPT	F2		CASP8AP2
PKN2		IL5		IL4		NOTCH1	EPHA2		ACIN1
DPEP1		MIR130A		IRF3		H2AX	CD86		FGF2
CHMP1A		STAC3		LTBP1		EZH2	IL21		BMP6
PYDC2		GHRL		MYO5A		ITPR1	ITGB4		PTPRC
MUC20		CD4		MYO6		LGALS3	P2RX7		DNAJA3
ACE2		C1QTNF8		NUP214		GDNF	CEACAM3		DAPK2
EGFR		EGFR		PABPN1		EPO	PTPN22		HLA-DRB1
AKT1		FLNC		PARK7		TNNT2	PRKDC		LCK
ATF6		IL18R1		PFKL		CDC25C	MSN		LMNA
CASP9		IL6R		PKM		SMPD1	ACE		PCSK9
ORMDL3		CPT2		RIPK2		MAP3K7	SELL		SPP1
POP1		CXCL10		TET2		PRKCE	CEACAM6		GDF15
LINC00958		CAT		TPM2		SPP1	VCP		F5
MIR4306		FCGR3A		TRAF6		TLR3	TJP1		IL9
MDM2		GSDME		TUBA4A		DSG2	TH		MIR146A
BTK		TLR3		TUBB4A		ALOX5	ITGAV		ITGAL
BCL2		PIK3CA		UBE2D3		PRKCI	DPP4		INS
YWHAE		IL11		UGDH		BMF	ARID1A		PTPN11
ANXA2		PRF1		CALM2		IL24	ATRX		BMP4
HSP90AA1		EPO		CCT5		NPM1	ITGA6		TOP1
HSP90AB1		MIR34A		FUS		FHIT	VDR		SERPINC1
IL1RN		KITLG		KRT19		ERBB3	HSPD1		HP
RIPK1		NTRK1		LGALS3		PTPA	SELP		NTRK1
IFIH1		TIMP3		MAP1B		STK11	SOD2		TIMP3
IRAK3		SPP1		OPTN		TNFSF11	NES		ALOX5
MELK		C4A		PKP2		RPS3	CD79B		ULK1
NEDD4		APOL1		RPL35		CADM3	CCR7		GADD45A
NFS1		PARN		RPS10		SHC1	MYLK		ANXA1
YWHAZ		UBC		S100A4		CHEK1	NANOG		MAP3K14
BECN1		NHP2		UBE2L3		RET	CACNA1A		MET
CD14		PROC		XRCC6		STIM1	GATA4		BCL2L12
CHI3L1		LINC02605		ACTC1		FOXP3	HSPG2		CREB1
STXBP2		VDR		AHSG		SPHK1	PARD3		MIR210
TLR9		IL6ST		ASIC1		MFN2	FANCD2		FGFR3
UBE2D3		RUNX2		CADM1		TCN1	IL12B		ODC1
GSTO1		HP		EEF1A1		FGFR1	CCL3		LYN
RAB5A		BRAF		EMD		ATP1A1	PSAP		TMBIM4
TNFSF13B		HLA-C		FLII		GJA1	ETS1		KITLG
ASIC1		APOB		GBE1		GAPDH	FUS		BEX3
HUWE1		SMPD1		KRT10		CSF2	TNFRSF10D		FOXP3
LRPPRC		RANBP2		KRT16		MADD	AFP		KAT5
PANX1		CXCR3		KRT6A		PDCD4	HLA-C		OLR1
PDCD6IP		PROS1		LITAF		LGALS1	CD70		RET
USP24		KRT18		NDUFA4		CD27	TF		ITGAM
ATG7		MIF		NRIP1		JAK3	MUC4		PI3
IL13		CASP7		PLEC		LCK	SHC1		VIM
CDC37		ADAMTS2		PNKD		IER3IP1	CXADR		CDC25C
ERP44		DKC1		PPM1B		JAK1	TOP2A		RAC1
IL18BP		NOP10		PSMA3		RAC1	EGR1		BCL2L2-PABPN1
TRPM2		KRAS		RBMX		CTSB	MBP		PLG
VPS4B		NFE2L2		RPL15		NUPR1	MIR27A		MIR16-1
ATG3		MIR125A		RPS14		NTRK1	CIITA		BAG6
BST2		TYK2		RPS20		GSN	TNFRSF10C		GCG
IL13RA2		MATN3		RPS3		GDF15	JAK1		UNC5A
LYST		PIK3C2A		S100A10		GSDMD	TBK1		ABCC1
STXBP3		CCL4		SFPQ		MKI67	BMP4		PRKCZ
GPER1		HSPA1A		SKP2		CDKN3	TNFRSF8		ZC3H12A
NCR1		MIR29A		SLC25A5		F9	TRAF6		VCAM1
VPS28		SLC2A1		STK38		VIM	NRG1		IFIH1
IL27		IRS1		TCOF1		TOP1	CYP1A1		LTBR
CLEC5A		MT-CO1		TCP1		SNCA	KRT8		NFKB2
SEC22B		PSTPIP1		TUBB4B		RNASEL	NOTCH2		EGR1
SIGLEC14		WNT5A		ULK1		MYBPC3	GRP		EIF2S1
CGAS		LBP		VDAC2		TNFRSF21	CD47		FGFR2
MIR15A		NLRP3		XRCC5		FLT3	ITGAM		DUSP19
		CCR1		XRN2		CAV1	CXCR3		THBS1
		MIR122		AP2S1		ERN1	CTNNA1		BMP2
		TRPS1		BANF1		ICAM1	NUMA1		SOCS3
		MALAT1		CALM3		ATF2	GNAS		FANCD2
		CDKN2A		CALU		TRAF6	BMI1		ARFGEF2
		TGFA		CAPZA1		FAM215A	TIMP1		PTK2B
		POLG2		CNBP		BAG1	CD55		MKI67
		SOD2-OT1		COPA		BCAP31	NEDD9		MLKL
		SELL		CUL4A		CXCL12	ELANE		ACHE
		ADAMTSL2		HNRNPU		PLEKHF1	EPAS1		CSF3
		VWF		KHDRBS1		TNNI3	SCN4A		XBP1
		FOS		KLF6		EIF5A	PDX1		TIMP1
		PRKN		KRT2		PIM1	MAP2		PDPK1
		HAVCR1		KRT7		F2	F3		CXCL12
		MYD88		KRT9		EIF2AK2	PNP		CCND3
		IFNA2		LGALS1		KDR	IL4R		IL7
		MMP13		MYO1C		PKP2	CALCA		SUMO1
		MIR214		NCL		UACA	NFATC2		FASN
		MTHFR		NSUN2		FGF2	HLA-DPB1		PSEN1
		THSD4		PABPC1		NDRG1	NFATC1		MAPT
		CREB1		PCBP1		TRAF3	SEMA3A		FAIM
		MAPKAPK2		PCM1		MYH6	BCAP31		NDUFS4
		MT-ND6		PRPF8		TMEM43	FGF1		HSP90AB1
		MMP12		RNGTT		IKBKG	IRF4		NLRP3
		TREX1		RPL10A		CD274	CXCL10		MIR223
		SH2D1A		RPL13		FUT2	CHAT		FCMR
		PPARA		RPL13A		LMNB1	PRKCB		MEF2A
		IL32		RPL22		IER3	CR1		MIR590
		BIRC5		RPL26		PIDD1	KLF4		F9
		MIR132		RPL27		PTPMT1	PARK7		EIF2AK3
		CCL11		RPL7		MT-CYB	NLRP3		MIR142
		POMC		RPL7A		DMD	CD33		SYK
		ADAM10		RPS12		F11	ITGA2		MYCN
		PIK3CG		RPS13		CARD16	BGLAP		TGFBR1
		CTC1		RPS17		SFN	PTHLH		HSPA8
		ADA2		RPS24		MET	PVR		TGFA
		PECAM1		RPS26		HSP90AB1	CD46		SIAH1
		GAPDH		RPS27		ACIN1	NTRK3		NUMA1
		F10		RPS6		YY1	PLA2G6		IRS1
		DNM1L		S100A6		BAG6	ANPEP		STAT5B
		CASP5		SLC25A10		PTPN13	ATR		ACE
		SERPINC1		SLC30A9		TNFRSF12A	CD69		PLAUR
		TONSL		TANK		TAF6	MIF		RHOA
		MIR146B		TNFRSF8		ACHE	HFE		TMBIM1
		SRC		TUBA1B		CRADD	BECN1		SMAD7
		USB1		TUBA1C		CDK6	FCGR2B		FGFR1
		SP1		AGO2		MDM4	ADAM10		NOX4
		OLR1		AP2B1		XBP1	CD38		MALT1
		CASP2		ATAD3A		NOS3	PDPN		CD80
		MAP3K1		BCLAF1		CCL2	CYP2A6		MIR155
		MYC		CCT3		LAMP2	CA9		DEDD2
		IKZF1		DNAJA1		PPM1D	LEPR		BCL2L15
		MIR222		DYNLL1		MIR499A	AHR		DDX3X
		CTSK		EIF4B		HSPD1	LGALS1		GDNF
		ITGB3		ELAVL1		SUMO1	NEUROD1		PAK1
		SLC17A5		IGF2BP3		STK24	KIR2DL3		PRDX2
		ELP1		IVNS1ABP		BNIP3L	CD59		LCN2
		FGFR1		MAP1LC3A		BMP6	IFNB1		SFPQ
		SERPINA1		PAWR		CD40LG	XRCC5		SFRP2
		IGFBP3		PDIA4		HGF	GLB1		SMPD2
		RTEL1-TNFRSF6B		PSMC4		CAST	TRD		EDN1
		DSPP		PYCARD		NKX2-5	HBG1		ITK
		CD36		RPL12		CSNK2A2	IDO1		CYLD
		CD8A		RPL23A		MIR155	F5		GSTP1
		LIF		RPL3		STAT5A	CP		NTRK2
		ENG		RPL4		ABCC1	ITGA2B		TRAF5
		BMP7		RPL9		PPP1R15A	TXN		SERPINE1
		IBSP		RPLP2		DYNLL1	CASP6		ITGAV
		ACP5		RPS23		JUP	CD68		CXCL5
		THBS1		RPS29		MEF2A	H2AX		IFI6
		AGER		SLC25A6		TMBIM6	HSPA8		TNFRSF8
		SMAD5-AS1		SNRPE		MAPK11	CD14		CD36
		LPL		SRSF1		FGFR3	NECTIN1		P2RX7
		APOA1		SVIL		STYXL1	KIR2DL1		HTT
		IRAK1		TUBB6		SREBF1	RPS27A		AGER
		ITGAM		CCNT1		RPS6KB1	GRN		SMAD2
		LOC100287329		CCT6A		MPZ	SMN1		NRG1
		ARSB		CCT8		BMP4	TTR		CBL
		EGR1		DDX17		LRP2	SERPINA3		S100A9
		SCARB2		DNAJA2		F5	MMP3		SPTAN1
		ITGB2		FIP1L1		TIMP1	XRCC6		PROC
		FCGR2A		HSPA1B		PRKCB	NT5E		CCR5
		OGA		IGF2BP1		SOCS3	PSCA		ATG14
		MIR181A1		IL24		CAPN2	BRD4		LEP
		MET		IQSEC1		CTLA4	MYL2		PRKCQ
		MBL2		MVP		JAG1	IL11		F2R
		MIR223		MYL6		CD69	RIPK3		NRP1
		MMP8		PDLIM7		MLH1	AREG		SKP2
		ALOX5		RIOK1		MAPK8IP1	COL2A1		PHLPP1
		PTH		RPS16		MIR34A	VTCN1		SET
		BPI		SF1		CASP8AP2	TNFRSF11A		PIK3C2A
		RIGI		SSBP1		KAT5	CALM3		DAB2IP
		SAMHD1		SYNCRIP		SOS1	ELN		MIR199A1
		MIR23A		ADAMTSL4		FGFR2	FGFR4		GADD45B
		EXT1		BAG2		MMP2	CD22		IGF2
		CDH23		CEP170		MT-RNR2	PLAT		APEX1
		CYLD		CLINT1		GDAP1	C3		MYH6
		RB1		COPS2		PCSK9	TGM2		IAPP
		ANGPT1		CPSF3		PRKD1	ALPP		IL4R
		MECOM		CPSF6		CDK11B	TLR7		MIR19B1
		AFP		GOSR1		FASN	MYH9		PRKAA1
		DVL3		HNRNPF		DAPK2	EIF2AK3		PRNP
		CCL20		HNRNPH1		GORASP1	CD99		ITGB1
		SIL1		HNRNPH3		OPTN	ANTXR2		PRKDC
		CDKN3		HNRNPL		IRS1	ANXA2		NOS1
		PRL		HNRNPM		ACVR1	VIP		RB1CC1
		FABP1		HOOK1		S100A9	ANXA1		ROCK1
		MIR145		KRT86		ATRAID	POLE		G0S2
		IL33		LARP1		VWF	APOB		HMGCR
		MMP14		LRRFIP2		DES	AGER		PPARA
		BAG4		MPP1		NQO1	LTA		CREBBP
		IL7		MRPS12		MYL3	RHD		CAPN1
